# Supplementary material for: Universal screening versus risk‐based protocols for antibiotic prophylaxis during childbirth to prevent early‐onset group B streptococcal disease: a systematic review and meta‐analysis
Source: PubMed Central journal article supplement (PMC7187465; doi:10.1111/1471-0528.16085), 2020-02-04
Supplement: BJO-127-680-s001.pdf [file BJO-127-680-s001.pdf]

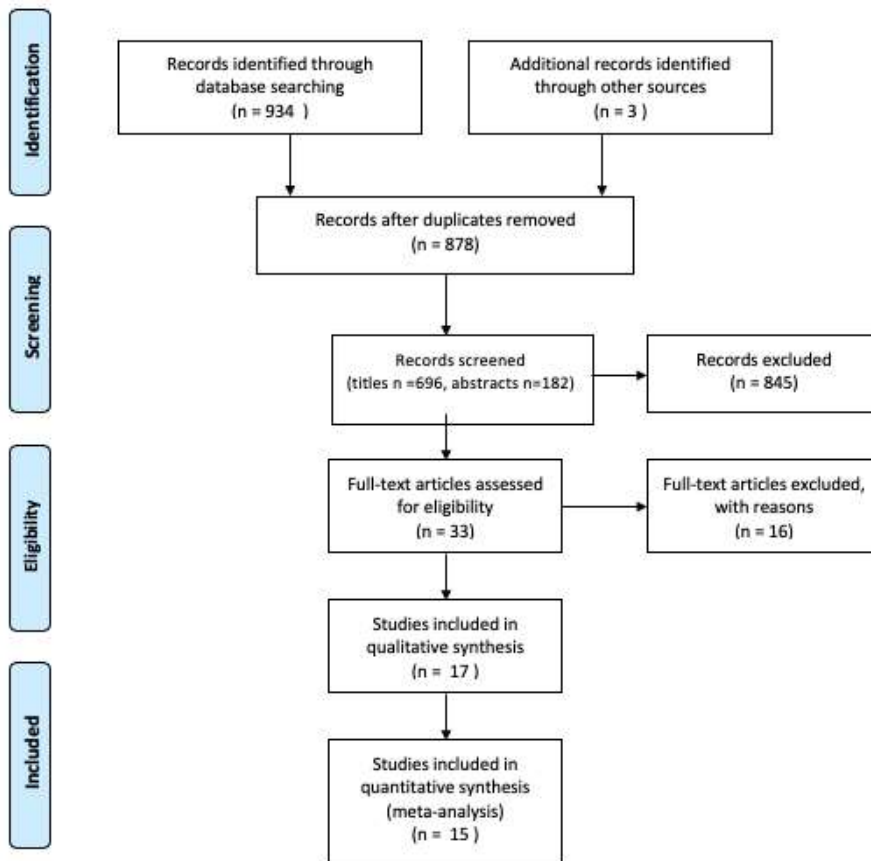

**Figure S1.** PRISMA<sup>6</sup> flow diagram: a visual representation of the systematic research process.
