# Supplementary material for: Universal screening versus risk‐based protocols for antibiotic prophylaxis during childbirth to prevent early‐onset group B streptococcal disease: a systematic review and meta‐analysis
Source: PubMed Central journal article supplement (PMC7187465; doi:10.1111/1471-0528.16085), 2020-02-04
Supplement: BJO-127-680-s002.pdf [file BJO-127-680-s002.pdf]

|                   | Bias due to confounding | Bias in selection | Bias in classification | Bias due to deviations | Bias due to missing data | Bias in measurement | Bias in selection of results | Overall bias |
|-------------------|-------------------------|-------------------|------------------------|------------------------|--------------------------|---------------------|------------------------------|--------------|
| Angstetra et al.  | +                       | +                 | +                      | ?                      | +-                       | +-                  | +-                           | +-           |
| Chen et al.       | -                       | +-                | +-                     | -                      | +-                       | +                   | +                            | -            |
| Edwards et al.    | -                       | +                 | -                      | -                      | +-                       | +                   | +                            | -            |
| Gilson et al.     | +                       | -                 | +                      | +                      | +-                       | +                   | +                            | +            |
| Main & Slagle     | +                       | +                 | +                      | +                      | +                        | +                   | +                            | +            |
| Schrag et al.     | +                       | +                 | +                      | +                      | +-                       | +                   | +                            | +            |
| Yücesoyet al.     | +                       | -                 | +                      | +                      | +                        | -                   | +                            | -            |
| Eisenberg et al.  | -                       | +                 | -                      | +                      | ?                        | +                   | -                            | +            |
| Vergani et al.    | +                       | +                 | +                      | +                      | +-                       | +                   | -                            | +            |
| Ma et al.         | -                       | +                 | +                      | +                      | ?                        | +                   | +                            | -            |
| Gopal Rao et al.  | +                       | +                 | +                      | +                      | +                        | +                   | +                            | +            |
| Darlow et al.     | -                       | +                 | +                      | -                      | +-                       | -                   | +                            | +/-          |
| Håkansson et al.  | -                       | +                 | +                      | +                      | +                        | +                   | +                            | +/-          |
| Bekker et al.     | +-                      | +                 | +                      | ?                      | +-                       | +                   | +                            | +            |
| O'Sullivan et al. | +-                      | +                 | +                      | +                      | +-                       | +                   | +                            | +            |
| Phares et al.     | +                       | +                 | +                      | ?                      | +-                       | +                   | ?                            | +            |
| Hung et al.       | ?                       | ?                 | ?                      | ?                      | -                        | +                   | ?                            | ?            |

**Figure S2.** Visual representation of risk of bias assessment done using the risk of bias tool 'ROBINS-I' by Cochrane.

+ low risk of bias; +- moderate risk; - serious risk; -- critical risk; ? no information
