# Supplementary material for: Universal screening versus risk‐based protocols for antibiotic prophylaxis during childbirth to prevent early‐onset group B streptococcal disease: a systematic review and meta‐analysis
Source: PubMed Central journal article supplement (PMC7187465; doi:10.1111/1471-0528.16085), 2020-02-04
Supplement: BJO-127-680-s003.pdf [file BJO-127-680-s003.pdf]

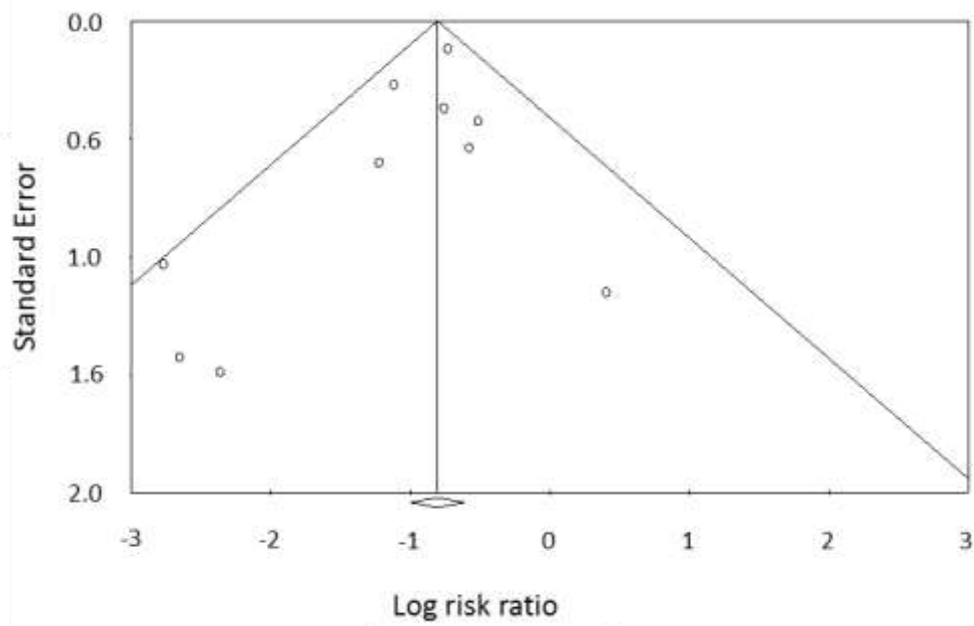

**Figure S3.** Funnel plot for meta-analysis of studies comparing universal screening vs risk-based protocols. Egger's regression test did not show statistically significant asymmetry of the funnel plot (2-tailed  $p = 0.180$ ).
