# Supplementary material for: Universal screening versus risk‐based protocols for antibiotic prophylaxis during childbirth to prevent early‐onset group B streptococcal disease: a systematic review and meta‐analysis
Source: PubMed Central journal article supplement (PMC7187465; doi:10.1111/1471-0528.16085), 2020-02-04
Supplement: BJO-127-680-s004.pdf [file BJO-127-680-s004.pdf]

**Table S1.** Search protocol, MeSH = Medical Subject Headings

|                       | <b>Free terms</b>                                  | <b>MESH terms</b>                  |
|-----------------------|----------------------------------------------------|------------------------------------|
| Problem               | Group B streptococcus;<br>Streptococcus agalactiae | Streptococcus agalactiae<br>[MeSH] |
| Patient group         | Newborn; pregnancy                                 | Pregnancy [MeSH]                   |
| Intervention protocol | Screening; Culture based policy;<br>Risk based     |                                    |
