# Supplementary material for: Universal screening versus risk‐based protocols for antibiotic prophylaxis during childbirth to prevent early‐onset group B streptococcal disease: a systematic review and meta‐analysis
Source: PubMed Central journal article supplement (PMC7187465; doi:10.1111/1471-0528.16085), 2020-02-04
Supplement: BJO-127-680-s005.pdf [file BJO-127-680-s005.pdf]

**Table S2.** Search strategy used to identify records in MEDLINE (final search March 2019). Similar queries were run in CINAHL and EMBASE.

| Search | Query                                                                                                                                                                                                                                                      | Items found |
|--------|------------------------------------------------------------------------------------------------------------------------------------------------------------------------------------------------------------------------------------------------------------|-------------|
| #5     | Search (((("streptococcus agalactiae") OR "group b streptococcus") OR streptococcus agalactiae[MeSH Terms])) AND (("newborn") OR "pregnancy") OR "pregnancy"[MeSH Terms]) AND (("screening") OR "culture based") OR "risk based") Filters: English & Dutch | 665         |
| #4     | Search (((("streptococcus agalactiae") OR "group b streptococcus") OR streptococcus agalactiae[MeSH Terms])) AND (("newborn") OR "pregnancy") OR "pregnancy"[MeSH Terms]) AND (("screening") OR "culture based") OR "risk based")                          | 768         |
| #3     | Search (("screening") OR "culture based") OR "risk based"                                                                                                                                                                                                  | 555326      |
| #2     | Search (("newborn") OR "pregnancy") OR "pregnancy"[MeSH Terms]                                                                                                                                                                                             | 1450974     |
| #1     | Search (("streptococcus agalactiae") OR "group b streptococcus") OR streptococcus agalactiae[MeSH Terms]                                                                                                                                                   | 9702        |
