# Supplementary material for: Universal screening versus risk‐based protocols for antibiotic prophylaxis during childbirth to prevent early‐onset group B streptococcal disease: a systematic review and meta‐analysis
Source: PubMed Central journal article supplement (PMC7187465; doi:10.1111/1471-0528.16085), 2020-02-04
Supplement: BJO-127-680-s006.pdf [file BJO-127-680-s006.pdf]

**Table S3.** Articles excluded from analysis in the last step of the reviewing process

|    | <b>Author</b>            | <b>Year</b> | <b>Country</b> | <b>Reason for exclusion</b>                                                                                                 |
|----|--------------------------|-------------|----------------|-----------------------------------------------------------------------------------------------------------------------------|
| 1  | Berardi et al.           | 2013        | Italy          | Problem with control group. Study only observes outcomes after adherence was improved                                       |
| 2  | Carbonell-Estrany et al. | 2012        | Spain          | Full text could not be obtained                                                                                             |
| 3  | Chang et al.             | 2017        | Taiwan         | Problem with control group and outcome. Onset of GBS infection not clearly defined (all infants <2 months included)         |
| 4  | Chen et al.              | 2018        | Australia      | Problem with control group. Compares epochs that differ only in optimisation of established policy.                         |
| 5  | Ginsberg et al.          | 2014        | Israel         | Calculations through a model, lack of empirical data                                                                        |
| 6  | Gopal Rao et al.         | 2017        | UK             | Same group has published a more extensive study with the same data                                                          |
| 7  | Homer et al.             | 2014        | n/a            | Review of guidelines, lack of empirical data                                                                                |
| 8  | Kalliola et al           | 1999        | Finland        | Problem with control group. Only pre-policy period studies.                                                                 |
| 9  | Khalil et al.            | 2018        | Denmark        | Outcome measure not EOGBS disease                                                                                           |
| 10 | Lin et al.               | 2011        | Taiwan         | Problem with co-intervention. Article discusses introduction of screening AND IAP in comparison of no screening AND no IAP. |
| 11 | Petersen et al.          | 2014        | Denmark        | Introduction of IAP coincides with introduction of new policy: co-intervention                                              |
| 12 | Raychaudhuri et al.      | 2016        | UK             | Very small sample, eligibility criteria mostly unclear                                                                      |
| 13 | Szymusik et al.          | 2013        | Poland         | Outcome measure not EOGBS disease                                                                                           |
| 14 | Van Dyke et al.          | 2009        | USA            | Problem with control group. Incidences in the control group (pre-screening) not clearly presented.                          |
| 15 | Wicker et al.            | 2018        | Germany        | Problem with the outcome. No possibility to distinguish between early and late onset disease                                |
| 16 | Daley et al.             | 2007        | 'Australasia'  | Absence of sufficiently different intervention groups                                                                       |
