# Supplementary material for: Universal screening versus risk‐based protocols for antibiotic prophylaxis during childbirth to prevent early‐onset group B streptococcal disease: a systematic review and meta‐analysis
Source: PubMed Central journal article supplement (PMC7187465; doi:10.1111/1471-0528.16085), 2020-02-04
Supplement: BJO-127-680-s007.pdf [file BJO-127-680-s007.pdf]

**Table S4.** Risk of bias assessment according to ROBINS-I, in studies comparing screening-based protocols and risk-based protocols (analysis 1). RoB, risk of bias, PB, performance bias

| Domain                                             | Angstetra et al. 2007                                                                                      | Chen et al. 2004                                                                                             | Edwards et al. 2003                                                                                    | Gilson et al. 2000                                                                                                            | Main&Slagle 2000                                                                                   | Schrag et al. 2002                                                                                                              | Yücesoy et al. 2004                                                                                     | Eisenberg et al. 2005                                                                                             | Vergani et al. 2002                                                                                                  | Ma et al. 2017                                                                                                          | Gopal Rao et al. 2017                                                                                        |
|----------------------------------------------------|------------------------------------------------------------------------------------------------------------|--------------------------------------------------------------------------------------------------------------|--------------------------------------------------------------------------------------------------------|-------------------------------------------------------------------------------------------------------------------------------|----------------------------------------------------------------------------------------------------|---------------------------------------------------------------------------------------------------------------------------------|---------------------------------------------------------------------------------------------------------|-------------------------------------------------------------------------------------------------------------------|----------------------------------------------------------------------------------------------------------------------|-------------------------------------------------------------------------------------------------------------------------|--------------------------------------------------------------------------------------------------------------|
| <b>Pre-intervention</b>                            |                                                                                                            |                                                                                                              |                                                                                                        |                                                                                                                               |                                                                                                    |                                                                                                                                 |                                                                                                         |                                                                                                                   |                                                                                                                      |                                                                                                                         |                                                                                                              |
| Bias due to confounding                            | Moderate risk<br>Study identifies confounders demographics and preterm, but no other factors.              | Serious risk<br>Study does not identify and deals with confounders sufficiently(demographics)                | Serious risk<br>Study does not address confounders sufficiently (EOGBS is also secondary outcome)      | Low-moderate risk<br>Groups are properly matched on demographics. Concurrent controls reduce RoB.                             | Moderate risk<br>Confounders are identified and dealt with. Although compliance seems a problem.   | Moderate risk<br>Most confounders controlled for. Use of concurrent controls diminishes RoB.                                    | Moderate risk<br>Some (e.g. preterm) confounders not controlled for.                                    | Serious risk<br>Confounders exist and are not controlled for.                                                     | Moderate risk<br>Accurately dealt with most, but not preterm delivery.                                               | Serious risk<br>Very little information is known about the risk-based group. Confounders suspected.                     | Low-Moderate risk<br>Confounders are dealt with and controlled for                                           |
| Bias in selection of participants of the study     | Low risk<br>Nearly all pregnant women in the population are included. NB: No prim. care clinics involved.  | Moderate risk<br>Selection is expected to represent population (but show-up for screening is not researched) | Moderate risk<br>Selection is expected to represent population (although show-up not researched)       | Serious risk<br>Hospital and satellite clinics are different intervention groups. Some explanation provided, but RoB remains. | Low risk<br>Authors present data on turn-up for screening (>96%), no indication of important bias. | Moderate risk<br>Selection bias: women in risk group had less prenatal care, and other ethnicity. Appropriately controlled for. | Critical risk<br>Selection bias in the screening group: are selected with threatening preterm delivery. | Moderate risk<br>Exclusions based on medical history pose a threat of bias. Weights are adjusted, but RoB remains | Moderate risk<br>Selection is expected to represent population; no information on women that showed for screening    | Moderate risk<br>Representative group of women.                                                                         | Low risk<br>Setting is the same in three periods.                                                            |
| <b>At intervention</b>                             |                                                                                                            |                                                                                                              |                                                                                                        |                                                                                                                               |                                                                                                    |                                                                                                                                 |                                                                                                         |                                                                                                                   |                                                                                                                      |                                                                                                                         |                                                                                                              |
| Bias in classification of interventions            | Moderate risk<br>Intervention (screen) described well, control intervention (risk) is not.                 | Moderate risk<br>Some risk of non-differential misclassification .                                           | Serious risk<br>Interventions not defined accurately, and adherence to guidelines is not investigated. | Moderate risk<br>Retrospective design, but little risk of misclassification suspected                                         | Low risk<br>Interventions are detailed. Implementing the protocols accurately and timely.          | Moderate risk<br>There are problems in the retrospective classification of interventions. Efforts to control are done.          | Low risk<br>Quasi-experimental, little bias from classification is suspected.                           | Serious risk<br>Some problems arise in retrospective classification of interventions.                             | Moderate risk<br>Interventions well defined. Problems during transition to new protocol suspected and not researched | Moderate risk<br>Risk-based policy is not defined well.                                                                 | Moderate risk<br>Contamination could have happened in the transition period. Dealt with adequately.          |
| <b>Post intervention</b>                           |                                                                                                            |                                                                                                              |                                                                                                        |                                                                                                                               |                                                                                                    |                                                                                                                                 |                                                                                                         |                                                                                                                   |                                                                                                                      |                                                                                                                         |                                                                                                              |
| Bias due to deviations from intended interventions | No information<br>No information on adherence is provided. NB: care improves over time, not addressed (PB) | Serious risk<br>Suggestions of (non-usual practice) deviations exist; PB not addressed.                      | Serious risk<br>No information on compliance is provided, nor is PB (co-intervention) addressed.       | Low risk<br>Concurrent controls. Compliance was retrospectively researched.                                                   | Low risk<br>Staff and patients were educated. Deviations as usual practice (intention-to-treat).   | Low risk<br>Concurrent controls. Although contaminations are expected, dealt with.                                              | Moderate risk<br>Concurrent controls reduced risk of deviation, but little information on adherence.    | Moderate risk<br>Concurrent controls, yet little information provided on adherence. Cross-over is expected.       | Moderate risk<br>Compliance mostly unclear. Could indicate a larger real effect.                                     | Moderate risk<br>Information on rate of IAP in colonized women is presented. NB: care improves over time, not addressed | Low risk<br>Extensive information on real practice is presented. Cross-over design reduces performance bias. |

|                                                  |                                                                                                                          |                                                                                                                                   |                                                                                                           |                                                                                                         |                                                                                                         |                                                                                                                                                       |                                                                                                                                        |                                                                                                             |                                                                                                                                                    |                                                                                                                                            |                                                                                                                         |
|--------------------------------------------------|--------------------------------------------------------------------------------------------------------------------------|-----------------------------------------------------------------------------------------------------------------------------------|-----------------------------------------------------------------------------------------------------------|---------------------------------------------------------------------------------------------------------|---------------------------------------------------------------------------------------------------------|-------------------------------------------------------------------------------------------------------------------------------------------------------|----------------------------------------------------------------------------------------------------------------------------------------|-------------------------------------------------------------------------------------------------------------|----------------------------------------------------------------------------------------------------------------------------------------------------|--------------------------------------------------------------------------------------------------------------------------------------------|-------------------------------------------------------------------------------------------------------------------------|
| <b>Bias due to missing data</b>                  | Moderate risk<br>Data were almost complete, although reporting issues not addressed.                                     | Moderate risk<br>Expected missing data (reporting problems) are not controlled for. RoB is limited.                               | Moderate risk<br>Expected missing data (reporting problems) are not controlled for. RoB is limited.       | Moderate risk<br>Missing data are present, but RoB is not expected from this.                           | Low risk<br>Missing data are not expected comprehensive mother-child integral database.                 | Moderate risk<br>95% of selected births (in 5425 births representative sample) had abstracted charts.                                                 | Low risk<br>No indication that missing data would impose bias                                                                          | No information                                                                                              | Moderate risk<br>Missing data addressed: not likely bias and would favour an increased effect.                                                     | No information<br>Missing data on risk-based period. Could not be solved by assessing earlier work.                                        | Low risk<br>No indication that missing data would impose bias                                                           |
| <b>Bias in measurements of outcomes</b>          | Moderate risk<br>Methods differ between groups, but are not likely to influence outcome                                  | Low risk<br>Knowledge on intervention is unexpected. Cases are identified using lab data                                          | Low risk<br>knowledge on intervention is unexpected. Cases are identified through lab records.            | Low risk<br>Both culture-confirmed and clinical sepsis are included, still low risk of bias.            | Low risk<br>Outcome measure was unlikely to be influenced by knowledge on intervention.                 | Low risk<br>Outcome measure was unlikely to be influenced by knowledge on intervention.                                                               | Serious risk<br>Cases are searched differently in groups. Outcome could be influenced.                                                 | Low risk<br>Outcome measure was unlikely to be influenced by knowledge on intervention.                     | Low risk<br>Outcome measure was unlikely to be influenced by knowledge on intervention.                                                            | Low risk<br>Outcome measure was unlikely to be influenced by knowledge on intervention.                                                    | Low risk<br>Outcome measure was unlikely to be influenced by knowledge on intervention.                                 |
| <b>Bias in selection of the reported results</b> | Moderate risk<br>Outcomes correspond to standard incidence measures                                                      | Moderate risk<br>Outcomes correspond to standard incidence measures                                                               | Moderate risk<br>Outcomes correspond to standard incidence measures                                       | Moderate risk<br>Outcomes correspond to standard incidence measures                                     | Moderate risk<br>Multiple outcome measures are presented, alongside the standard measure for incidence. | Moderate risk<br>Overview of result is presented extensively, but in fractions instead of absolute numbers                                            | Moderate risk<br>No indication that selection would have happened.                                                                     | Serious risk<br>No indication that selection would have happened.                                           | Serious risk<br>Comparison of maternal risk factors between different periods is missing.                                                          | Moderate risk<br>No indication that selection would have happened.                                                                         | Moderate risk<br>No indication that selection would have happened.                                                      |
| <b>Overall risk of bias</b>                      | Moderate risk<br>The study has risks in the domain of confounding, although other domains are generally without problems | Serious risk<br>Study has critical problems in the domains of confounding and information on intervention status and missing data | Serious risk<br>Study has some problems due to possible confounders, and the absence of detailed methods. | Moderate risk<br>Generally sound study, but intervention groups differ. Problems are mostly dealt with. | Moderate risk<br>The study is sound for a non-randomized study. Problems are mostly dealt with.         | Moderate risk<br>Study has some problems (mostly with assignment of intervention) but authors have adequately dealt with them to minimize the effect. | Critical risk<br>Too much risk of bias arises from selection of preterm delivering women into the screening group. Not controlled for. | Moderate risk<br>Study has concurrent controls (reducing time-dependent bias), but has some selection bias. | Moderate risk<br>Study has a good overall design but handling of confounders in: at least one important domain was not measured or controlled for. | Serious risk<br>Study has problems in defending validity of outcomes of the period with risk-based protocols. Methods and results missing. | Moderate risk<br>This is a sound study for an observational study. Adherence and demographics are very closely studied. |
