# Supplementary material for: Universal screening versus risk‐based protocols for antibiotic prophylaxis during childbirth to prevent early‐onset group B streptococcal disease: a systematic review and meta‐analysis
Source: PubMed Central journal article supplement (PMC7187465; doi:10.1111/1471-0528.16085), 2020-02-04
Supplement: BJO-127-680-s008.pdf [file BJO-127-680-s008.pdf]

**Table S5.** Risk of bias assessment: studies assessing introduction of either of the two protocols compared to a period/area of ‘no policy’ (analysis 2)

| Domain                                             | Darlow et al. 2016                                                                                                                              | Håkansson et al. 2017                                                                                                                   | Bekker et al. 2014                                                                                                                                 | O' Sullivan et al. 2019                                                                                                              | Phares et al. 2008                                                                                                                                                               | Hung et al. 2018                                                                                                                 |
|----------------------------------------------------|-------------------------------------------------------------------------------------------------------------------------------------------------|-----------------------------------------------------------------------------------------------------------------------------------------|----------------------------------------------------------------------------------------------------------------------------------------------------|--------------------------------------------------------------------------------------------------------------------------------------|----------------------------------------------------------------------------------------------------------------------------------------------------------------------------------|----------------------------------------------------------------------------------------------------------------------------------|
| <b>Pre-intervention</b>                            |                                                                                                                                                 |                                                                                                                                         |                                                                                                                                                    |                                                                                                                                      |                                                                                                                                                                                  |                                                                                                                                  |
| Bias due to confounding                            | Serious risk<br>Confounders are addressed but not sufficiently dealt with.                                                                      | Serious risk<br>Not all confounders (i.e. demographic change) addressed. This might influence outcomes.                                 | Moderate risk<br>Although confounders are present, (some) evidence of their limited influence on the effect is presented                           | Moderate risk<br>Some confounders are expected, most are addressed sufficiently. Some missing information from the previous studies. | Moderate risk<br>Confounders identified. Discussion provides suggestion that in both cases true effect would be larger if controlled for.                                        | No information<br>Too little information on the former period of observation is provided; period 2 is well done.                 |
| Bias in selection of participants of the study     | Low risk<br>Setting in hospitals and community care. Problems in reporting by clinicians is not likely to be related to intervention or outcome | Low risk<br>Nearly all women and births in Sweden are likely to be included in the study.                                               | Moderate risk<br>Information is retrieved from a national surveillance, which covers most but not all cases. Assignment to intervention was clear. | Moderate risk<br>Some selection bias might exist, Could imply a reduced true effect.                                                 | Moderate risk<br>Cases might be better reported in some states than in other. Some states were included after guidelines. Statistically controlled for, but not in main outcomes | Serious risk<br>Problems exist: only screened women are included in period 2. NB: screening was made free of charge immediately. |
| <b>At intervention</b>                             |                                                                                                                                                 |                                                                                                                                         |                                                                                                                                                    |                                                                                                                                      |                                                                                                                                                                                  |                                                                                                                                  |
| Bias in classification of interventions            | Moderate risk<br>Due to the prospective study, misclassification not expected. Yet, some hospitals employ other policy.                         | Low risk<br>It is clear which clinic switched to the nationally promulgated policy. Despite retrospective design, little bias expected. | Low risk<br>It is clear when institutions switched to the new protocol. Despite retrospective design, little bias expected.                        | Low risk<br>It is clear when institutions switched to the new protocol. Because time periods are far apart, little bias expected.    | Low risk<br>Clearly demarcated periods, little bias in classification expected.                                                                                                  | No information<br>Very little information is provided on earlier periods, so it is not possible to make an estimation.           |
| <b>Post-intervention</b>                           |                                                                                                                                                 |                                                                                                                                         |                                                                                                                                                    |                                                                                                                                      |                                                                                                                                                                                  |                                                                                                                                  |
| Bias due to deviations from intended interventions | Serious risk<br>Little information, but bias due to improved health care can be expected.                                                       | Moderate risk<br>Implementation of guidelines gradual over the two periods. Some control for this is in place.                          | No information<br>Adherence is not studied, no data.                                                                                               | Moderate risk<br>Some suggestion that adherence to policy was better in second period. Real effect would be increased.               | No information<br>Rates of IAP are unclear                                                                                                                                       | No information                                                                                                                   |

|                                           |                                                                                                                                                  |                                                                                                                                                                         |                                                                                                                                                         |                                                                                                                                                              |                                                                                                                                                                                                              |                                                                                                                                                                                            |
|-------------------------------------------|--------------------------------------------------------------------------------------------------------------------------------------------------|-------------------------------------------------------------------------------------------------------------------------------------------------------------------------|---------------------------------------------------------------------------------------------------------------------------------------------------------|--------------------------------------------------------------------------------------------------------------------------------------------------------------|--------------------------------------------------------------------------------------------------------------------------------------------------------------------------------------------------------------|--------------------------------------------------------------------------------------------------------------------------------------------------------------------------------------------|
| Bias due to missing data                  | Moderate risk<br>Little information is known on IAP administration overall and on compliance. Only confirmed (lab) GBS included in main outcome. | Low risk<br>Cases of clinical sepsis (non-confirmed) are researched in the study, but not the main outcomes. Outcomes are similar                                       | Moderate risk<br>Estimation of infants' ages was suboptimal. Possible bias is addressed in discussion.                                                  | Moderate risk<br>Not all risk factors were recorded in period 1. Not expected to affect the outcome.                                                         | Moderate risk<br>Inherent underreporting is a risk of bias. Would only increase observed effect.                                                                                                             | Serious risk<br>As only women who undergo screening are included in the study, underreporting is likely                                                                                    |
| Bias in measurements of outcomes          | Serious risk<br>5 of 56 cases in period 1 were measured by methods no longer employed in period 2. This could increase the reported effect.      | Moderate risk<br>While laboratory-confirmed GBS is not influenced by the outcome, the more subjective assessment of 'clinical sepsis' might. Authors address subgroups. | Moderate risk<br>Reporting of cases might have improved over the years, yet levels of E.Coli stayed constant making an effect of this bias less likely. | Low risk<br>Although various methods for the yielding of records for cases were employed, outcome is based on laboratory-confirmed cases.                    | Low risk<br>Knowledge of intervention is not expected to have a large effect on outcome.                                                                                                                     | Low risk<br>Measurement through lab data; knowledge of intervention is not expected to have a large effect on outcome.                                                                     |
| Bias in selection of the reported results | Moderate<br>Outcomes correspond to standard incidence measures                                                                                   | Moderate<br>Not possible to assess, but little selection of results is suspected, as main outcome measures are present.                                                 | Moderate<br>Outcomes correspond to standard incidence measures                                                                                          | Low risk<br>Many results are presented comprehensively, in accordance to earlier study.                                                                      | No information                                                                                                                                                                                               | No information                                                                                                                                                                             |
| <b>Overall risk of bias</b>               | Moderate-serious risk<br>In general sound, but controlling for confounders is not sufficient.                                                    | Moderate-Serious risk<br>In general sound, but controlling for confounders is not sufficient.                                                                           | Moderate risk<br>Although inherent problems in this retrospective study exist, they are dealt with in the discussion section.                           | Moderate risk<br>Despite inherent flaws of the design, controlling measures are in place. Authors address effects of possible confounders in the discussion. | Moderate risk<br>Although populations between intervention groups seem to differ, authors explained possible consequences well. In general, many factors are investigated, reducing overlooked risk of bias. | No information<br>Although the analyses on the current incidence and current risk factors is sound, risk of bias in claims on improvement compared to earlier periods cannot be confirmed. |

---
