# Supplementary material for: Universal screening versus risk‐based protocols for antibiotic prophylaxis during childbirth to prevent early‐onset group B streptococcal disease: a systematic review and meta‐analysis
Source: PubMed Central journal article supplement (PMC7187465; doi:10.1111/1471-0528.16085), 2020-02-04
Supplement: BJO-127-680-s009.pdf [file BJO-127-680-s009.pdf]

**Table S6.** Numbers needed to screen (NNS) as calculated from data in the included studies. Interventions were either screening-based or risk-based protocols.

|                        | Screening versus risk | Risk versus no policy | Screening versus no policy |
|------------------------|-----------------------|-----------------------|----------------------------|
| Angstetra et al. 2007  | 1190                  |                       |                            |
| Bekker et al. 2014     |                       | 579*                  |                            |
| Chen et al. 2005       | 1429                  |                       |                            |
| Darlow et al. 2016     |                       | 3704                  |                            |
| Edwards et al. 2003    | 1471                  |                       |                            |
| Eisenberg et al. 2005  | 2222                  |                       |                            |
| Gilson et al. 2000     | 671                   |                       |                            |
| Gopal Rao et al. 2017  | 1515                  |                       |                            |
| Håkansson et al. 2017  |                       | 10000                 |                            |
| Hung et al. 2018       |                       |                       | 1250                       |
| Ma et al. 2018         |                       |                       |                            |
| Main & Slagle 2000     | 971                   |                       |                            |
| O'Sullivan et al. 2019 |                       | 11111*                |                            |
| Phares et al. 2008     |                       |                       | 7692                       |
| Schrag et al. 2002     | 2857                  |                       |                            |
| Vergani et al. 2002    | 3333                  |                       |                            |
| Yücesoy et al. 2004    | -200**                |                       |                            |
| <b>Pooled NNS</b>      | 1875                  | Not available         | Not available              |

\*'no policy' was superior to risk-based protocols \*\*risk-based was superior to screening
