# Supplementary material for: Universal screening versus risk‐based protocols for antibiotic prophylaxis during childbirth to prevent early‐onset group B streptococcal disease: a systematic review and meta‐analysis
Source: PubMed Central journal article supplement (PMC7187465; doi:10.1111/1471-0528.16085), 2020-02-04
Supplement: BJO-127-680-s010.pdf [file BJO-127-680-s010.pdf]

**Table S7.** Secondary outcomes with weighted means. Estimated rate of vaginal colonisation in the population, the portion of parturients treated with antibiotic prophylaxis under different policies, and the portion of resistant pathogens isolated from clinically ill infants. AB, antibiotics; GBS, group B streptococcus.

| Authors                | 1. Estimated prevalence of GBS colonization in pregnant women | 2. Rate of AB use in screening era (in all pregnant women) | 2. Rate of AB use in risk-based era (in all pregnant women) | 3. GBS isolates resistant to penicillin/ampicillin | 3. GBS isolates resistance to erythromycin | 3. GBS isolates resistance to clindamycin |
|------------------------|---------------------------------------------------------------|------------------------------------------------------------|-------------------------------------------------------------|----------------------------------------------------|--------------------------------------------|-------------------------------------------|
| Angstetra et al. 2007  | 24%                                                           |                                                            |                                                             |                                                    |                                            |                                           |
| Chen et al. 2005       |                                                               |                                                            |                                                             | 0%                                                 | 14% (highest)                              |                                           |
| Edwards et al. 2003    |                                                               |                                                            |                                                             | 0%                                                 | 0%                                         |                                           |
| Eisenberg et al. 2005  | 24%                                                           |                                                            |                                                             |                                                    |                                            |                                           |
| Gilson et al. 2000     | 13.3%                                                         |                                                            |                                                             |                                                    |                                            |                                           |
| Gopal Rao et al. 2017  | 29%                                                           |                                                            |                                                             |                                                    |                                            |                                           |
| Ma et al. 2018         | 21.8%*                                                        |                                                            |                                                             |                                                    |                                            |                                           |
| Main & Slagle 2000     | 13.4%                                                         | 26%                                                        | 25%**                                                       | 0%                                                 |                                            |                                           |
| Schrag et al. 2002     | 24%                                                           | 31%**                                                      | 29%**                                                       |                                                    |                                            |                                           |
| Vergani et al. 2002    | 18%                                                           | 28%                                                        |                                                             |                                                    |                                            |                                           |
| Yücesoy et al. 2004    | 7%                                                            | 16%                                                        | 21.2%                                                       |                                                    |                                            |                                           |
| Bekker et al 2014      |                                                               |                                                            |                                                             |                                                    |                                            |                                           |
| Darlow et al. 2016     |                                                               |                                                            |                                                             |                                                    |                                            |                                           |
| Håkansson et al. 2017  |                                                               |                                                            |                                                             |                                                    |                                            |                                           |
| Hung et al 2018        | 19.60%*                                                       |                                                            |                                                             |                                                    |                                            |                                           |
| O'Sullivan et al. 2019 |                                                               |                                                            |                                                             | 0%                                                 | 25%                                        | 17%                                       |
| Phares et al. 2008     |                                                               |                                                            |                                                             | 0%                                                 | 32%                                        | 15%                                       |
| <b>Weighted mean</b>   | <b>23%</b>                                                    | <b>31%</b>                                                 | <b>29%</b>                                                  | <b>0%</b>                                          | <b>19%</b>                                 | <b>16%</b>                                |

\*Excluded from weighted mean due to lack of data \*\*Computed rates based on prophylaxis indications and an assumption of near-perfect compliance.
