# Supplementary material for: Universal screening versus risk‐based protocols for antibiotic prophylaxis during childbirth to prevent early‐onset group B streptococcal disease: a systematic review and meta‐analysis
Source: PubMed Central journal article supplement (PMC7187465; doi:10.1111/1471-0528.16085), 2020-02-04
Supplement: BJO-127-680-s011.pdf [file BJO-127-680-s011.pdf]

**Table S8.** Missed cases in the included studies. Three groups of cases are included based on policy and maternal indication for prophylaxis.

| <b>Authors</b>         | <b>Risk-based period: of the GBS infants, how many were born to mothers without risk factors?</b> | <b>Screening period: of the GBS infants, how many were born to mothers with negative screening result?</b> |
|------------------------|---------------------------------------------------------------------------------------------------|------------------------------------------------------------------------------------------------------------|
| Angstetra et al. 2007  |                                                                                                   |                                                                                                            |
| Chen et al. 2005       |                                                                                                   |                                                                                                            |
| Edwards et al. 2003    |                                                                                                   |                                                                                                            |
| Eisenberg et al. 2005  | 58%                                                                                               | 40%                                                                                                        |
| Gilson et al. 2000     | 75%                                                                                               | 0%                                                                                                         |
| Gopal Rao et al. 2017  | 11%                                                                                               | 0%                                                                                                         |
| Ma et al. 2018         |                                                                                                   | 41.3%                                                                                                      |
| Main & Slagle 2000     | 46% *                                                                                             |                                                                                                            |
| Schrag et al. 2002     | 62% **                                                                                            |                                                                                                            |
| Vergani et al. 2002    | 75%                                                                                               | 17%                                                                                                        |
| Yücesoy et al. 2004    | 66%                                                                                               |                                                                                                            |
| Bekker et al 2014      |                                                                                                   |                                                                                                            |
| Darlow et al. 2016     | 45%                                                                                               |                                                                                                            |
| Håkansson et al. 2017  | 43%                                                                                               |                                                                                                            |
| Hung et al 2018        |                                                                                                   | 58%                                                                                                        |
| O'Sullivan et al. 2019 | 40% (lowest)                                                                                      |                                                                                                            |
| Phares et al. 2008     |                                                                                                   |                                                                                                            |
| <b>Weighted mean</b>   | 41%                                                                                               | 24%                                                                                                        |

GBS, Group B Streptococcus.

\*only cases in term newborns are included \*\* both cases under screening and risk-based protocols taken together.
